# Supplementary material for: Lsh Is Essential for Maintaining Global DNA Methylation Levels in Amphibia and Fish and Interacts Directly with Dnmt1
Source: Hindawi journal article supplement (doi:10.1155/2015/740637), 2015-01-01
Supplement: f1 [file 740637.f1.zip]

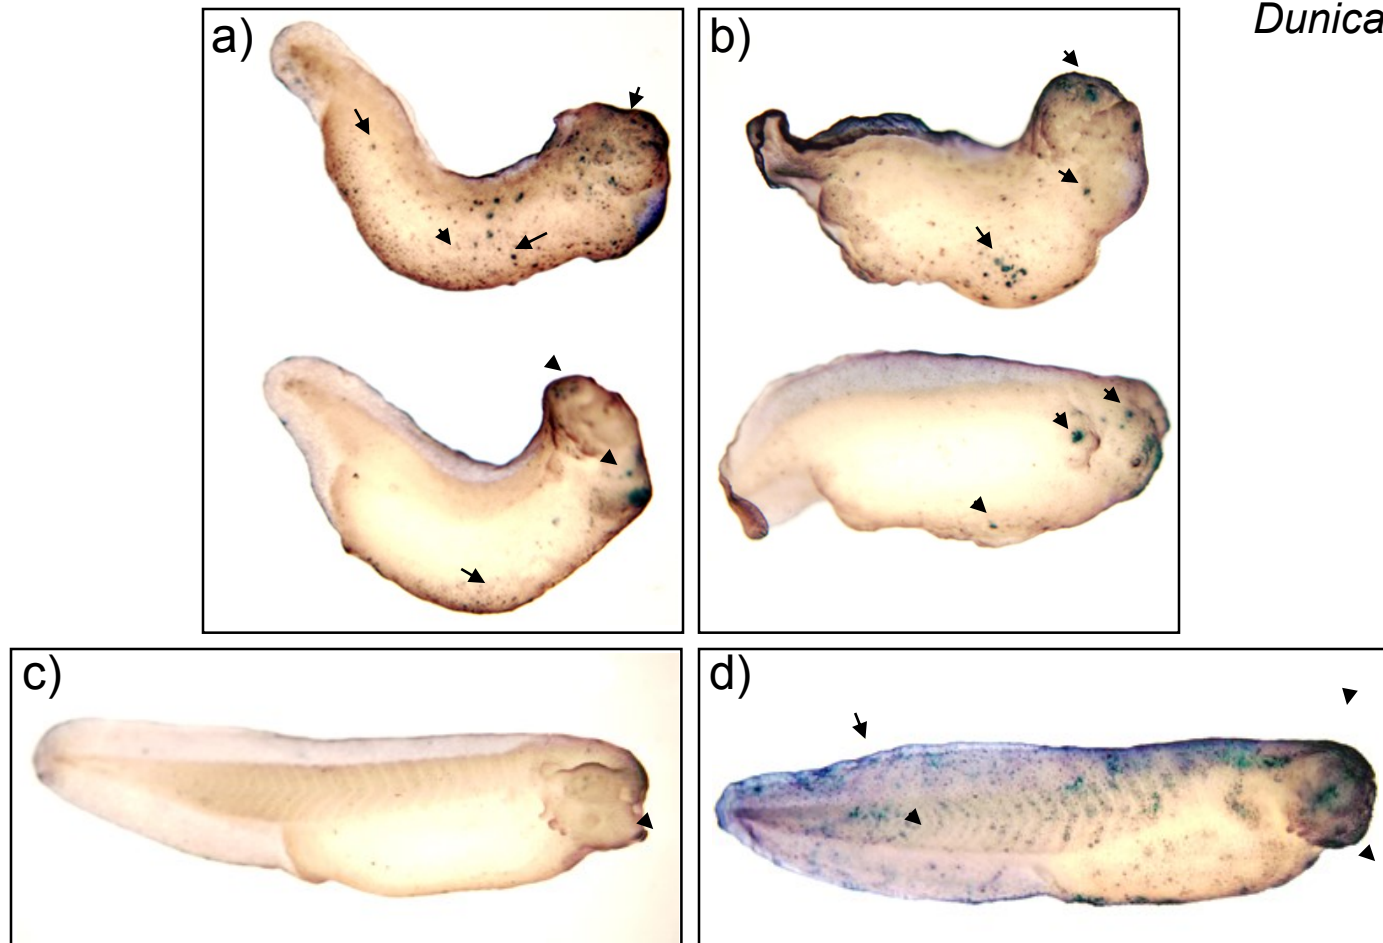

**Supp S3 . xLSH morphants are not apoptotic.** a) Shown are early tadpole xLMO morphant embryos which show moderate Tunel-positive signals (indicating apoptosis) compared to a wildtype control of the same stage (c) which has no detectable Tunel signals. b) Shown are tadpole xLMO morphant embryos which show moderate Tunel-positive signals (indicating apoptosis) compared to a wildtype control of the same stage (d). Note in (d) the presence of many Tunel positive cells which imply cell lineages undergoing metamorphosis accompanied by cell death. Black arrows indicate Tunel-positive cells. All microinjections are in each blastomere of a 2-cell embryo; morpholino amount = 5-10ng.
