# Supplementary material for: Lsh Is Essential for Maintaining Global DNA Methylation Levels in Amphibia and Fish and Interacts Directly with Dnmt1
Source: Hindawi journal article supplement (doi:10.1155/2015/740637), 2015-01-01
Supplement: f1 [file 740637.f1.zip]

a)

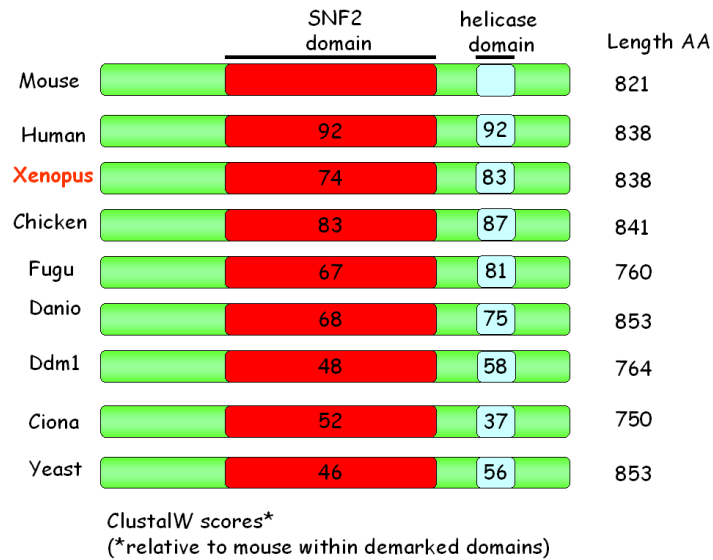

b)

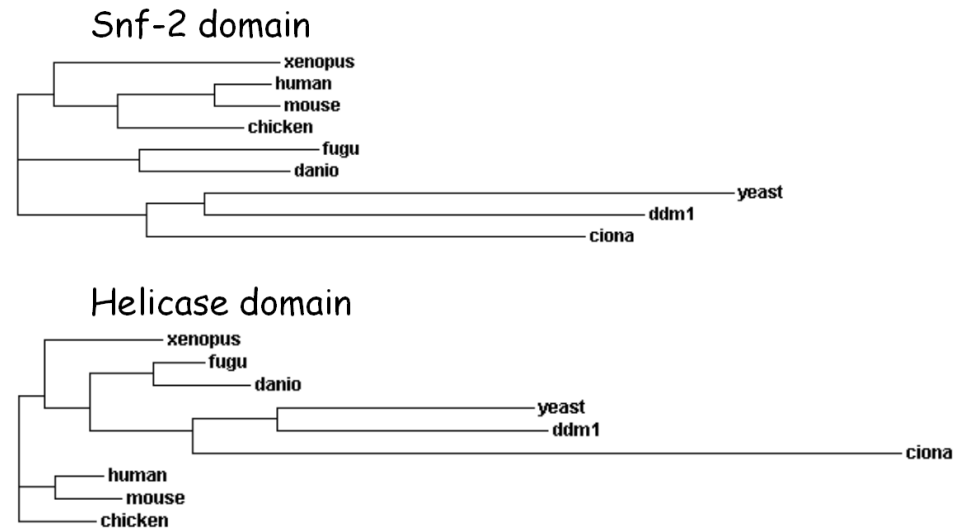

**Supp S1 . Comparison of xLSH protein sequence to non-Xenopus LSH homologues.** A) Shown is a protein sequence alignment of LSH proteins from mammals to yeast. The numbers shown on each protein subdomain indicate the % identity of each LSH protein to the murine form. B) Phylogenetic trees were generated using ClustalW ([www.ebi.ac.uk](http://www.ebi.ac.uk)) of the LSH Snf-2 domain and the LSH helicase domain.
