# Supplementary material for: Lsh Is Essential for Maintaining Global DNA Methylation Levels in Amphibia and Fish and Interacts Directly with Dnmt1
Source: Hindawi journal article supplement (doi:10.1155/2015/740637), 2015-01-01
Supplement: f1 [file 740637.f1.zip]

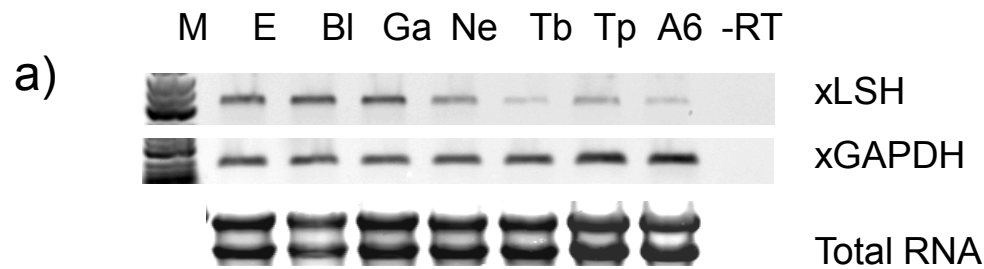

b)

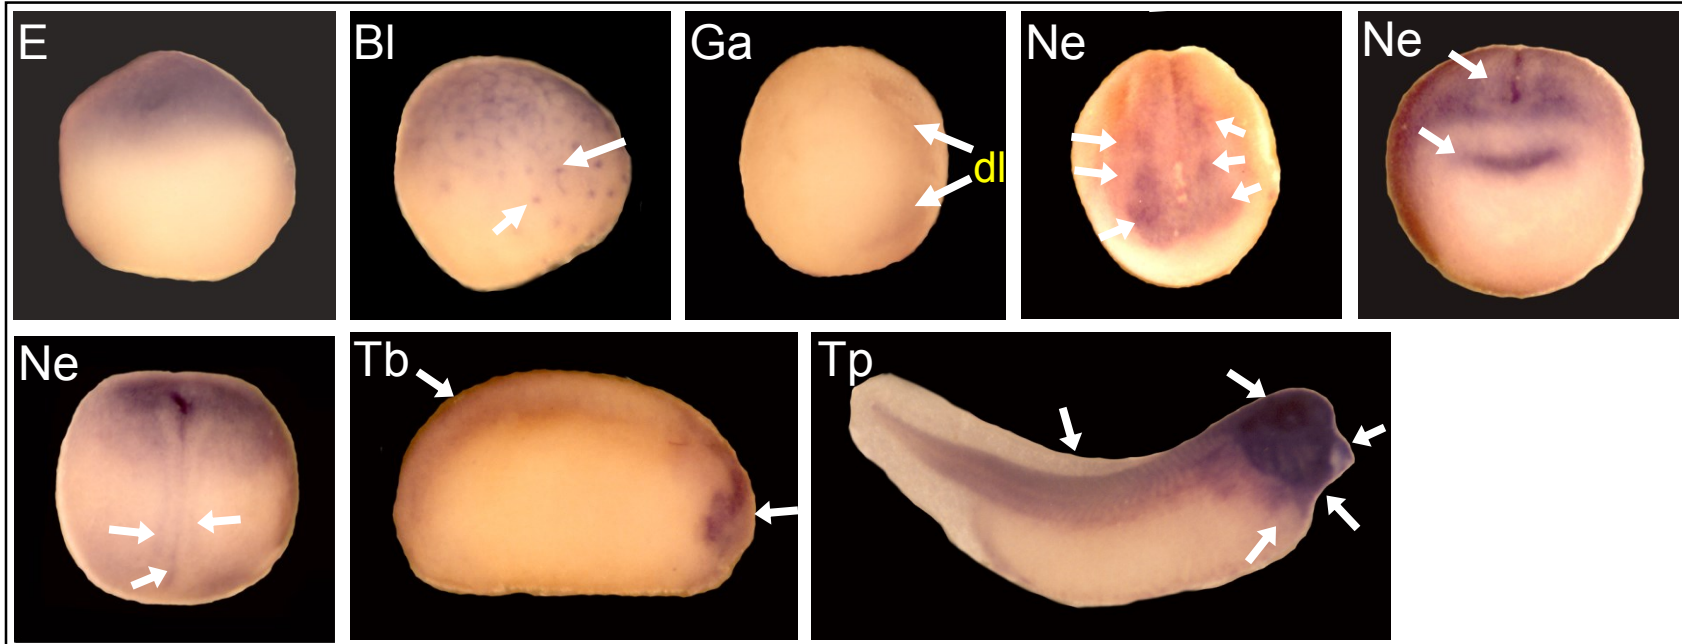

**Supp S2 . xLSH expression pattern during development** A) Shown is temporal RT-PCR analysis of xLSH during embryonic development from unfertilised egg cells to fully developed tadpoles and the *Xenopus* kidney-derived cell-line A6. RT-PCR was also carried out for xGAPDH as a loading control. B) Shown is the spatial RNA *in situ* hybridisation pattern using an xLSH antisense RNA probe. Stages shown are: E=egg, bl=blastula, ga=gastrula, ne=neurula, tb=tailbud, td=tadpole, A6=A6 cell-line, -RT=-reverse transcriptase RT-PCR control. Both assays reveal xLSH to be semi-ubiquitous, indicating its importance during each stage of development.
