# Supplementary material for: Lsh Is Essential for Maintaining Global DNA Methylation Levels in Amphibia and Fish and Interacts Directly with Dnmt1
Source: Hindawi journal article supplement (doi:10.1155/2015/740637), 2015-01-01
Supplement: f1 [file 740637.f1.zip]

a)

| survival charts |            |             |             | phenotype charts |            |                    |        |     |        |
|-----------------|------------|-------------|-------------|------------------|------------|--------------------|--------|-----|--------|
|                 | dead 24hrs | dead 48 hrs | alive 48hrs |                  | dead 24hrs | strong (d. 48 hrs) | medium | low | normal |
| zLMO            | 202        | 28          | 52          | zLMO             | 202        | 28                 | 22     | 27  | 3      |
| CMO             | 45         | 3           | 165         | CMO              | 45         | 3                  | 0      | 0   | 165    |
| non injected    | 38         | 0           | 221         | non injected     | 38         | 0                  | 0      | 0   | 221    |

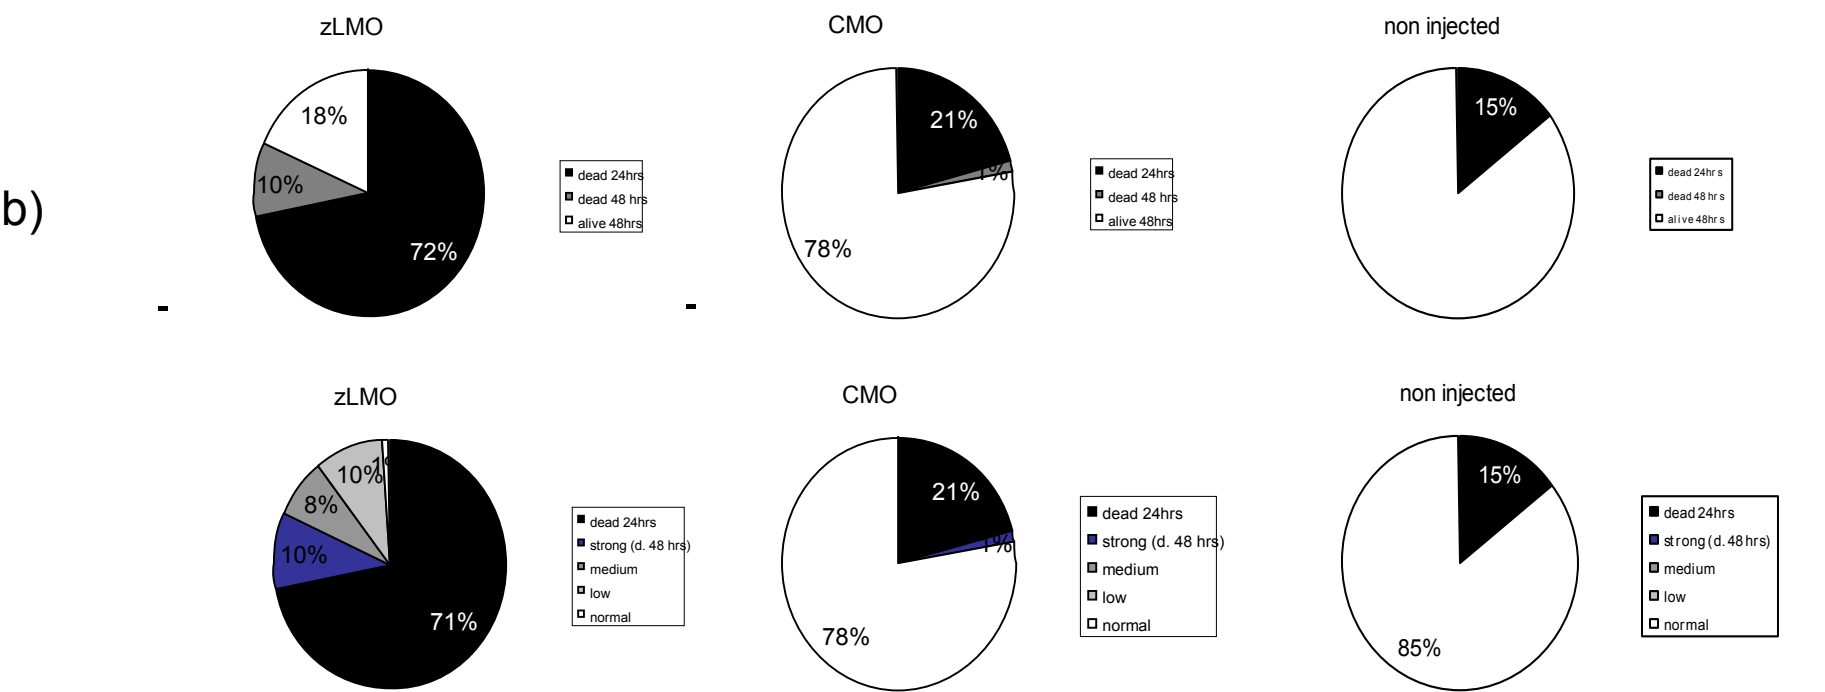

**Supp. S5 Comparison of zLMO, control morpholino and non-injected fish embryos.** (a) Survival charts comparing zLMO, CMO and non-injected embryos between 24 and 48hr post-fertilisation. Phenotype charts comparing zLMO, CMO and non-injected embryos between 24 and 48hr post-fertilisation. (b) Graphical representation of the chart data in (a).
