# Supplementary material for: Lsh Is Essential for Maintaining Global DNA Methylation Levels in Amphibia and Fish and Interacts Directly with Dnmt1
Source: Hindawi journal article supplement (doi:10.1155/2015/740637), 2015-01-01
Supplement: f1 [file 740637.f1.zip]

a)

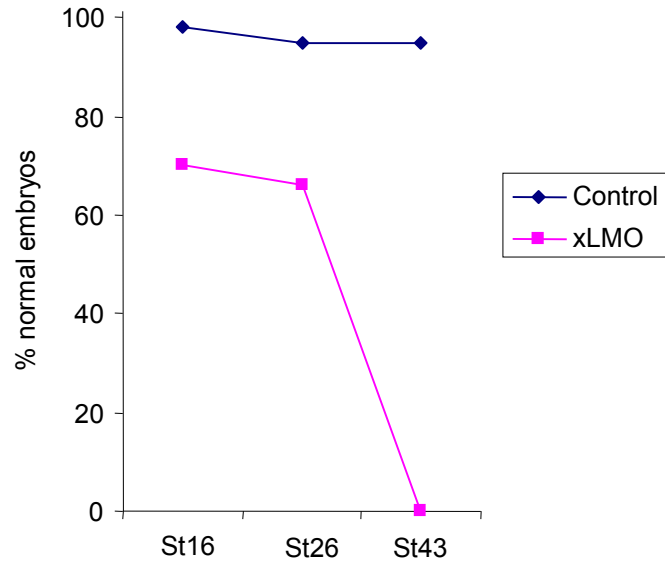

b)

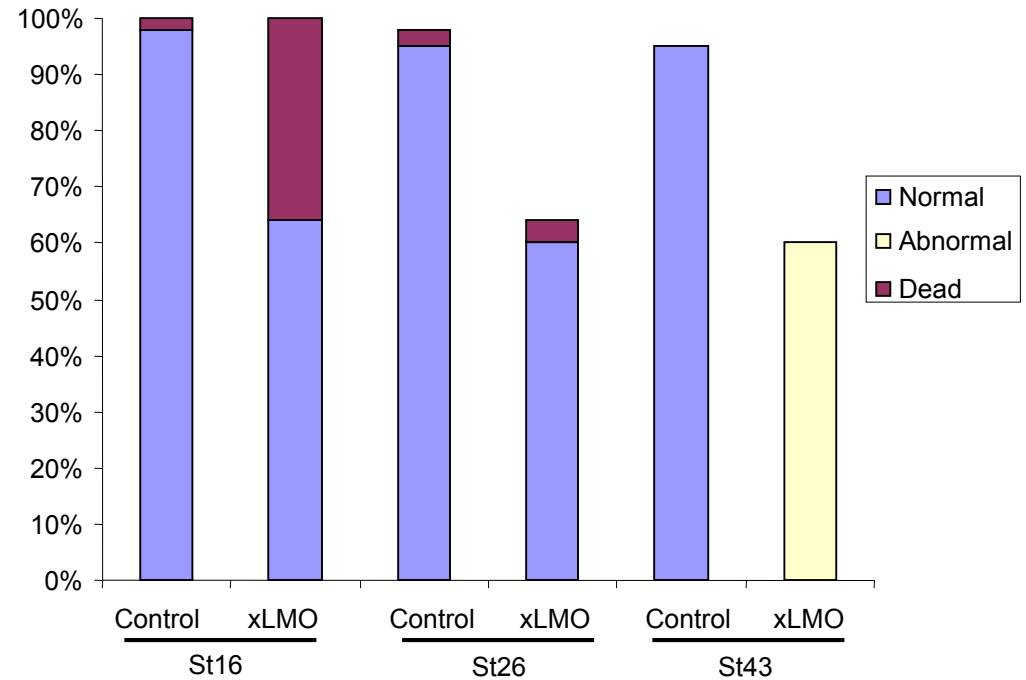

**Supp. S4 Comparison of xLMO and control injected embryos.** a) Shown is a graph which details the number of phenotypically normal embryos at each corresponding developmental stage. Control injected embryos are shown in blue and xLMO injected morphants are shown in pink. At stage 16 (neurulation) only 70% of morphants appear normal compared to >96% for the control siblings. Later in development (between stages 26 (tailbud) and 43 (tadpole)) the % of phenotypically normal morphant embryos decreases markedly to zero at stage 43. b) Shown are the percentages of normal embryos through development. Comparison of the xLMO bars indicates that after initial lethality at stage 16 morphant embryos do not die subsequently but suffer from developmental delay.
