# Supplementary material for: Lsh Is Essential for Maintaining Global DNA Methylation Levels in Amphibia and Fish and Interacts Directly with Dnmt1
Source: Hindawi journal article supplement (doi:10.1155/2015/740637), 2015-01-01
Supplement: f1 [file 740637.f1.zip]

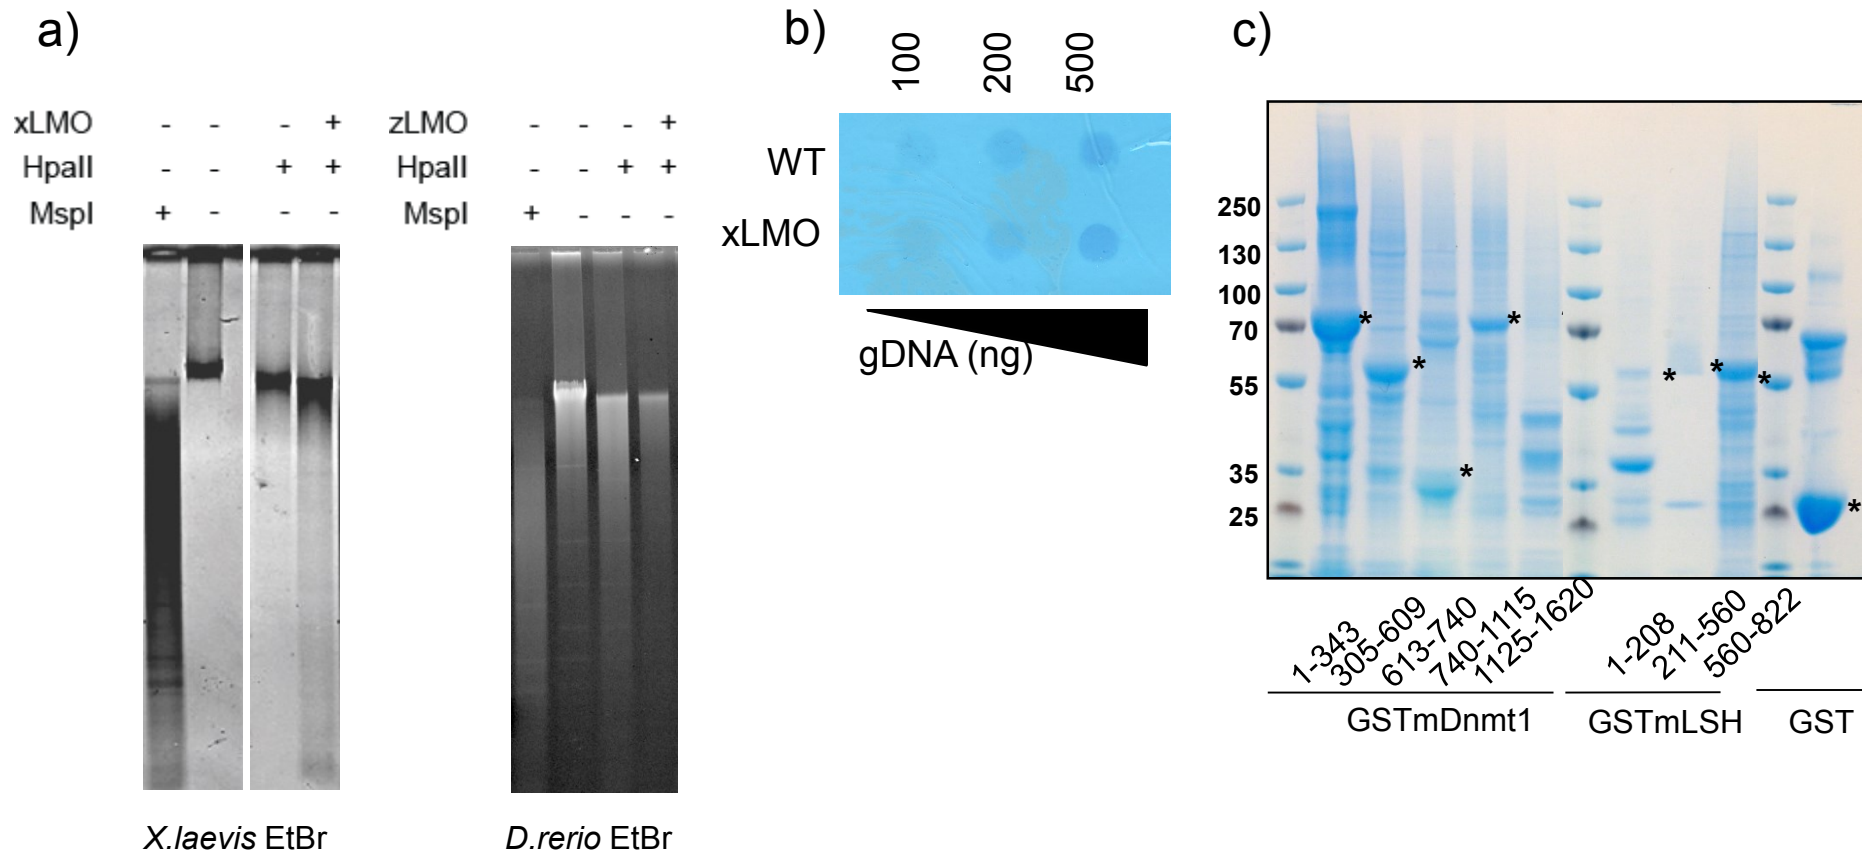

**Supp S6. Ethidium bromide staining, methylene blue staining of dot-blot DNA and coomassie gel of purified GST-fusion proteins used in GST-pulldown experiments.** (a) Ethidium gels of digests from Figure 1f-g. (b) Methylene blue staining of *Xenopus laevis* wildtype and xLMO tadpole stage DNA over three dilutions as in Figure 1. (c) Asterisks indicate each GST-fusion protein which are detailed below the gel. Some fusions show strong induction in *E. coli* whereas others show weaker induction. Indeed, some fusions show more breakdown products than others. For the experiments in the main body of this paper (Fig. 2), care was taken to ensure that regardless of which GST-fusion was used that its concentration was not limiting.
