# Supplementary material for: Lsh Is Essential for Maintaining Global DNA Methylation Levels in Amphibia and Fish and Interacts Directly with Dnmt1
Source: Hindawi journal article supplement (doi:10.1155/2015/740637), 2015-01-01
Supplement: f1 [file 740637.f1.zip]

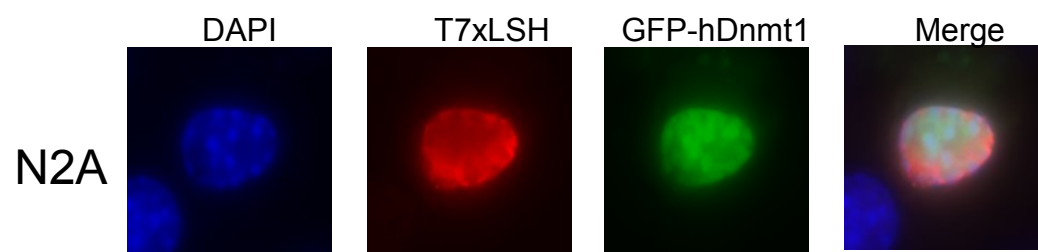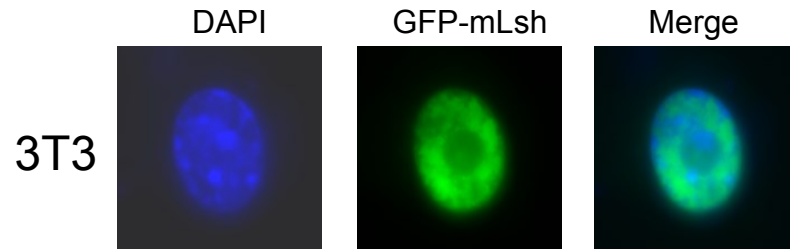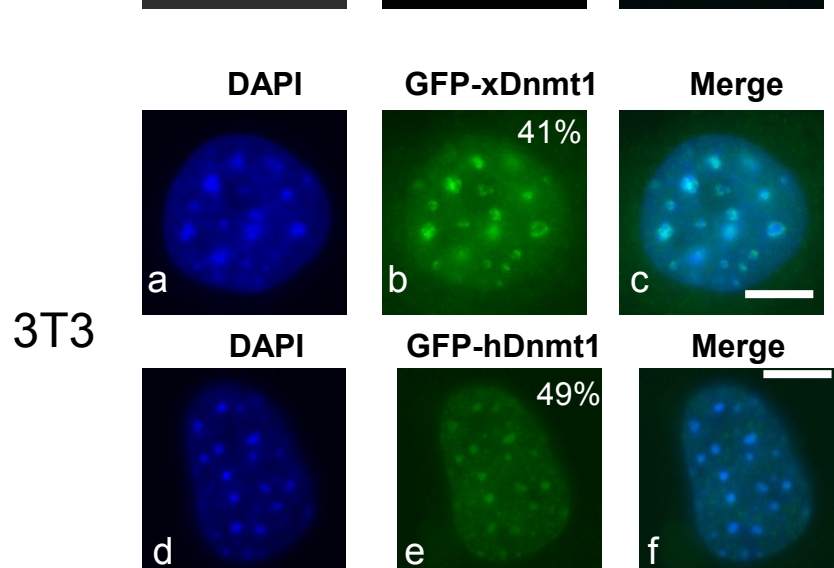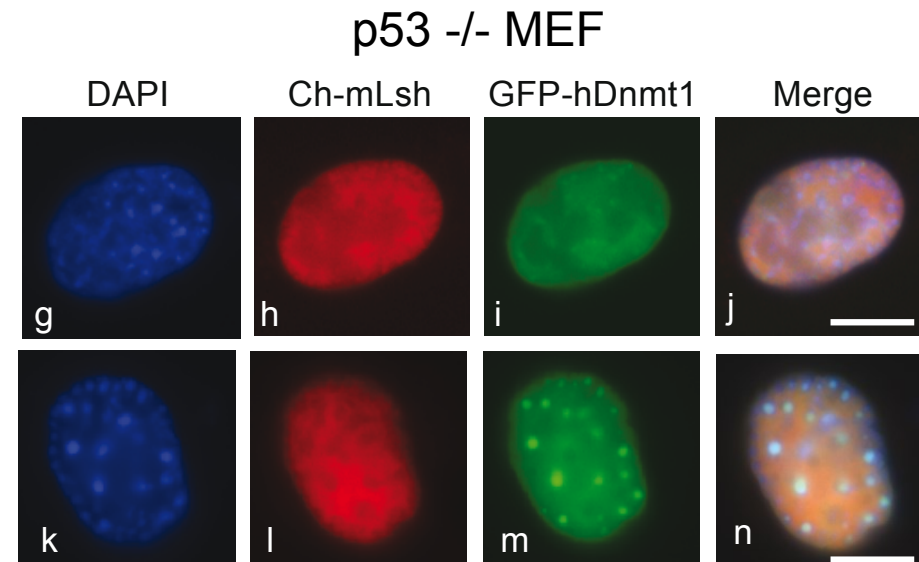

**Supp. S7 mLSH is nuclear diffuse in many mouse cell lines.** Direct fluorescence of mLSH in two additional mouse cell lines – Neuro2A (N2A) & 3T3. These data show (with the MEF data) that LSH localisation to heterochromatic nuclear foci is a rare event. Additionally, expression of GFP-tagged *Xenopus* Dnmt1 (xDnmt1) or human Dnmt1 (hDnmt1) in 3T3 cells shows strong association between Dnmt1 and heterochromatic foci (a-f). Lsh and Dnmt1 coexpression does not recruit Lsh to pericentric heterochromatin (g-n)
