# Supplementary material for: Lsh Is Essential for Maintaining Global DNA Methylation Levels in Amphibia and Fish and Interacts Directly with Dnmt1
Source: Hindawi journal article supplement (doi:10.1155/2015/740637), 2015-01-01
Supplement: f1 [file 740637.f1.zip]

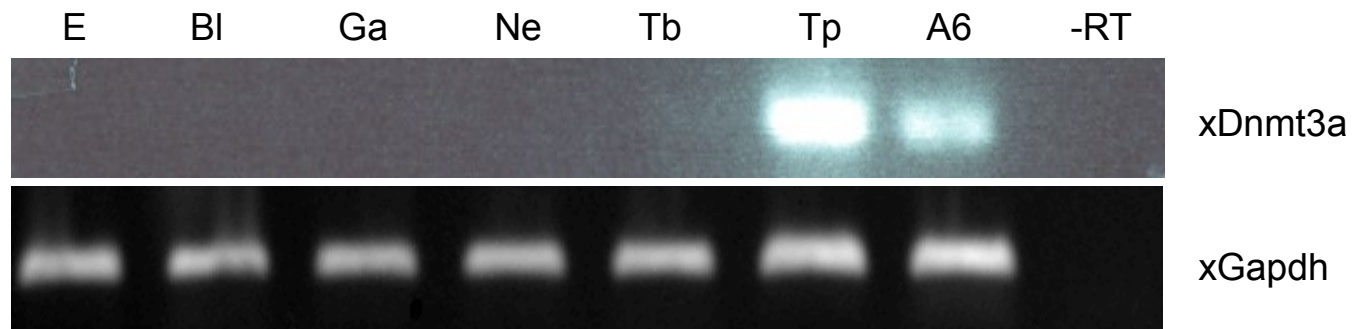

**Supp S8 . xDnmt3a expression pattern during development.** Shown is temporal RT-PCR analysis of xDnmt3aL1 during embryonic development from unfertilised egg cells to fully developed tadpoles and the *Xenopus* kidney-derived cell-line A6. Stages shown are: E=egg, bl=blastula, ga=gastrula, ne=neurula, tb=tailbud, td=tadpole, A6=A6 cell-line, -RT=-reverse transcriptase RT-PCR control
